# Supplementary figures and images for: Forecasting the SARS COVID-19 pandemic and critical care resources threshold in the Gulf Cooperation Council (GCC) countries: population analysis of aggregate data
Source: HighWire-hosted journal article supplement (doi:10.1136/bmjopen-2020-044102), 2021-05-01

**Figure S1.** COVID-19 infection transition states based on SEICRD model

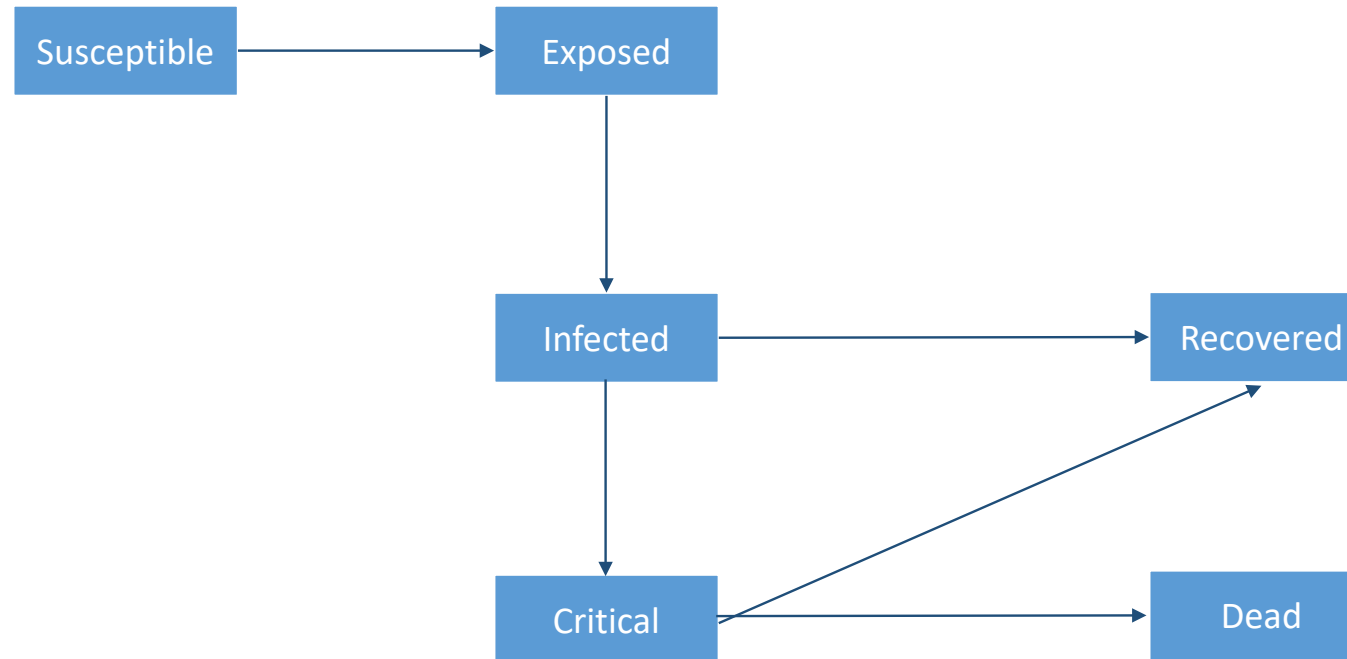

Supplement: bmjopen-2020-044102supp001_data_supplement.pdf [file bmjopen-2020-044102supp001_data_supplement.pdf]
